# Supplementary material for: Experimental and theoretical studies of cross-stream migration of non-spherical particles in a quadratic flow of a viscoelastic fluid
Source: Royal Society of Chemistry journal article supplement (doi:10.1039/d2sm00011c), 2022-01-01
Supplement: d2sm00011c1.pdf [file d2sm00011c1.pdf]

## Supporting Information - Experimental and theoretical studies of cross-stream migration of non-spherical particles in a quadratic flow of viscoelastic fluid

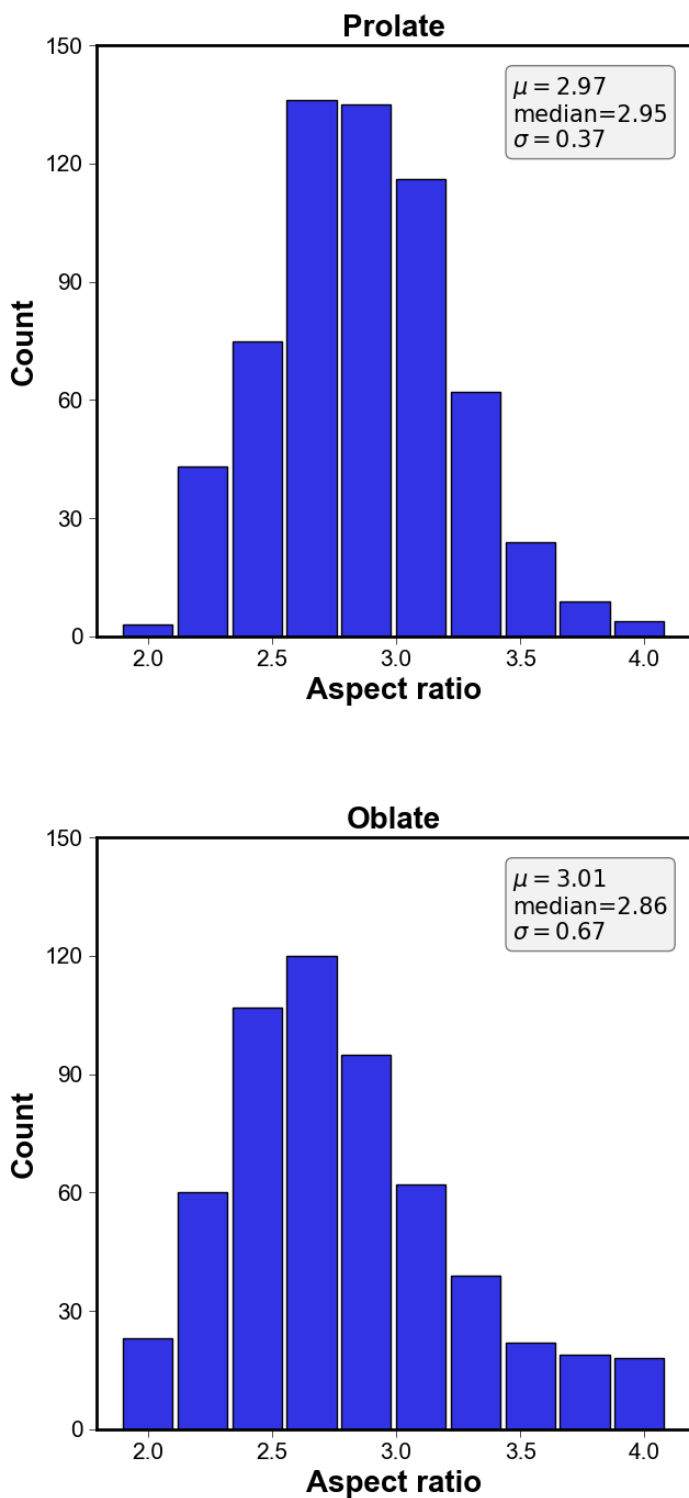

Figure S1. Statistical data on the particle aspect ratio  $A_R$  of prolate and oblate particles. For each type of particle, we collected the geometry data of 600 individual particles. The mean ( $\mu$ ) aspect ratio and standard deviation ( $\sigma$ ) of prolate/oblate particle is 2.97/3.01 and 0.37/0.67, respectively.
